# Supplementary material
Source: Springer Nature journal article supplement (https://www.springermedizin.de/resource/supplementary/12931_2013_1472_MOESM5_ESM.pdf/9426242)

A.

si CONTROL

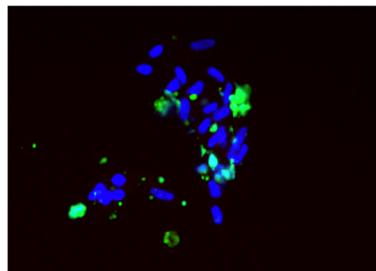

si TRIP-1

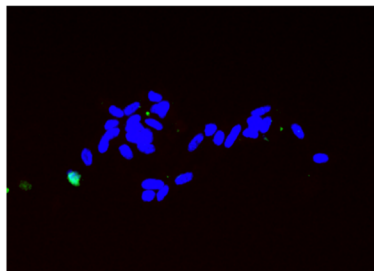

B.

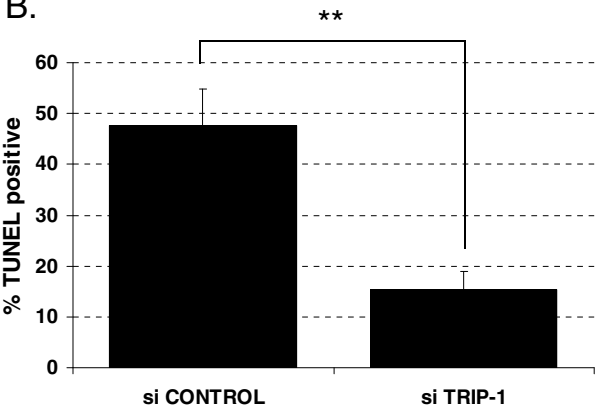

C.

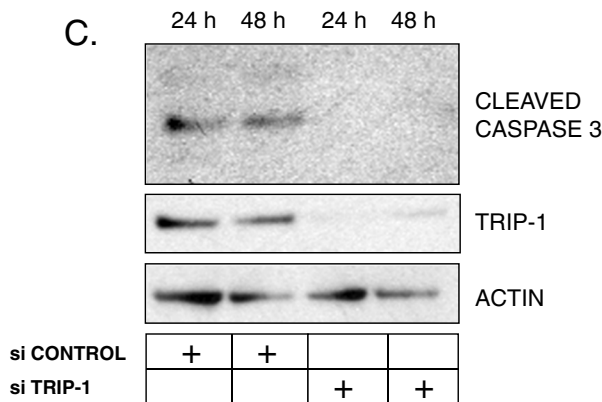

Supplement: MOESM5 [file 9426242]
